# Supplementary material
Source: publisher figshare collection journal article supplement (https://acs.figshare.com/ndownloader/files/6451188)
Supplement: Supplementary file 1 [file 6451188]

  
data_2 
  
_audit_creation_method            SHELXL-97 
_chemical_name_systematic 
; 
 '[La2(4-cba)6(phen)2(H2O)6]' 
; 
_chemical_name_common             '[La2(4-cba)6(phen)2(H2O)6]' 
_chemical_melting_point           ? 
_chemical_formula_moiety          '[La2(4-cba)6(phen)2(H2O)6]' 
_chemical_formula_sum 
 'C72 H52 La2 N10 O18' 
_chemical_formula_weight          1623.06 
  
loop_ 
 _atom_type_symbol 
 _atom_type_description 
 _atom_type_scat_dispersion_real 
 _atom_type_scat_dispersion_imag 
 _atom_type_scat_source 
 'C'  'C'   0.0033   0.0016 
 'International Tables Vol C Tables 4.2.6.8 and 6.1.1.4' 
 'H'  'H'   0.0000   0.0000 
 'International Tables Vol C Tables 4.2.6.8 and 6.1.1.4' 
 'N'  'N'   0.0061   0.0033 
 'International Tables Vol C Tables 4.2.6.8 and 6.1.1.4' 
 'O'  'O'   0.0106   0.0060 
 'International Tables Vol C Tables 4.2.6.8 and 6.1.1.4' 
 'La'  'La'  -0.2871   2.4523 
 'International Tables Vol C Tables 4.2.6.8 and 6.1.1.4' 
  
_symmetry_cell_setting            'triclinic' 
_symmetry_space_group_name_H-M    'P-1' 
  
loop_ 
 _symmetry_equiv_pos_as_xyz 
 'x, y, z' 
 '-x, -y, -z' 
  
_cell_length_a                    6.99710(10) 
_cell_length_b                    14.33860(10) 
_cell_length_c                    18.9494(2) 
_cell_angle_alpha                 108.363(8) 
_cell_angle_beta                  97.397(7) 
_cell_angle_gamma                 103.890(7) 
_cell_volume                      1707.96(3) 
_cell_formula_units_Z             1 
_cell_measurement_temperature     293(2) 
_cell_measurement_reflns_used     4813 
_cell_measurement_theta_min       3.0088 
_cell_measurement_theta_max       27.4835 
  
_exptl_crystal_description        'Prism' 
_exptl_crystal_colour             'Colorless' 
_exptl_crystal_size_max           0.1800 
_exptl_crystal_size_mid           0.1600 
_exptl_crystal_size_min           0.1000 
_exptl_crystal_density_meas       ? 
_exptl_crystal_density_diffrn     1.578 
_exptl_crystal_density_method     'not measured' 
_exptl_crystal_F_000              812 
_exptl_absorpt_coefficient_mu     1.314 
_exptl_absorpt_correction_type    'Multi-scan' 
_exptl_absorpt_correction_T_min   0.8948 
_exptl_absorpt_correction_T_max   1.0000 
_exptl_absorpt_process_details    'Sphere (Rigaku CrystalClear)' 
  
_exptl_special_details 
; 
 ? 
; 
  
_diffrn_ambient_temperature       293.1500 
_diffrn_radiation_wavelength      0.71073 
_diffrn_radiation_type            MoK\a 
_diffrn_radiation_source          'Rotating Anode' 
_diffrn_radiation_monochromator   graphite 
_diffrn_measurement_device_type   'Rigaku Mercury CCD' 
_diffrn_measurement_method        \w 
_diffrn_detector_area_resol_mean  ? 
_diffrn_standards_number          ? 
_diffrn_standards_interval_count  ? 
_diffrn_standards_interval_time   ? 
_diffrn_standards_decay_%         ? 
_diffrn_reflns_number             10854 
_diffrn_reflns_av_R_equivalents   0.0190 
_diffrn_reflns_av_sigmaI/netI     0.0304 
_diffrn_reflns_limit_h_min        -8 
_diffrn_reflns_limit_h_max        8 
_diffrn_reflns_limit_k_min        -17 
_diffrn_reflns_limit_k_max        16 
_diffrn_reflns_limit_l_min        -22 
_diffrn_reflns_limit_l_max        15 
_diffrn_reflns_theta_min          3.01 
_diffrn_reflns_theta_max          25.02 
_reflns_number_total              5990 
_reflns_number_gt                 5639 
_reflns_threshold_expression      >2sigma(I) 
  
_computing_data_collection        'CrystalClear (Rigaku Corp., 2002)' 
_computing_cell_refinement        'CrystalClear (Rigaku Corp., 2002)' 
_computing_data_reduction         'CrystalClear (Rigaku Corp., 2002)' 
_computing_structure_solution     'Siemens SHELXTL^TM^ 5' 
_computing_structure_refinement   'Siemens SHELXTL^TM^ 5' 
_computing_molecular_graphics     'Bruker SHELXTL' 
_computing_publication_material   'Siemens SHELXTL^TM^ 5' 
  
_refine_special_details 
; 
 Refinement of F^2^ against ALL reflections.  The weighted R-factor wR and 
 goodness of fit S are based on F^2^, conventional R-factors R are based 
 on F, with F set to zero for negative F^2^. The threshold expression of 
 F^2^ > 2sigma(F^2^) is used only for calculating R-factors(gt) etc. and is 
 not relevant to the choice of reflections for refinement.  R-factors based 
 on F^2^ are statistically about twice as large as those based on F, and R- 
 factors based on ALL data will be even larger. 
; 
  
_refine_ls_structure_factor_coef  Fsqd 
_refine_ls_matrix_type            full 
_refine_ls_weighting_scheme       calc 
_refine_ls_weighting_details 
 'calc w=1/[\s^2^(Fo^2^)+(0.0373P)^2^+0.6699P] where P=(Fo^2^+2Fc^2^)/3' 
_atom_sites_solution_primary      direct 
_atom_sites_solution_secondary    difmap 
_atom_sites_solution_hydrogens    geom 
_refine_ls_hydrogen_treatment     mixed 
_refine_ls_extinction_method      none 
_refine_ls_extinction_coef        ? 
_refine_ls_number_reflns          5990 
_refine_ls_number_parameters      473 
_refine_ls_number_restraints      6 
_refine_ls_R_factor_all           0.0285 
_refine_ls_R_factor_gt            0.0256 
_refine_ls_wR_factor_ref          0.0637 
_refine_ls_wR_factor_gt           0.0617 
_refine_ls_goodness_of_fit_ref    1.004 
_refine_ls_restrained_S_all       1.005 
_refine_ls_shift/su_max           0.000 
_refine_ls_shift/su_mean          0.000 
  
loop_ 
 _atom_site_label 
 _atom_site_type_symbol 
 _atom_site_fract_x 
 _atom_site_fract_y 
 _atom_site_fract_z 
 _atom_site_U_iso_or_equiv 
 _atom_site_adp_type 
 _atom_site_occupancy 
 _atom_site_symmetry_multiplicity 
 _atom_site_calc_flag 
 _atom_site_refinement_flags 
 _atom_site_disorder_assembly 
 _atom_site_disorder_group 
La1 La 0.176491(19) 0.170095(10) 0.064102(8) 0.01990(6) Uani 1 1 d . . . 
O1W O 0.5054(3) 0.13509(15) 0.11736(13) 0.0349(5) Uani 1 1 d D . . 
H1WA H 0.494(5) 0.0756(15) 0.1295(18) 0.042 Uiso 1 1 d D . . 
H1WB H 0.642(2) 0.158(2) 0.1156(18) 0.042 Uiso 1 1 d D . . 
O2W O 0.4518(3) 0.21196(15) -0.00891(11) 0.0323(4) Uiso 1 1 d D . . 
H2WA H 0.565(3) 0.2601(18) 0.0281(13) 0.039 Uiso 1 1 d D . . 
H2WB H 0.494(4) 0.1559(15) -0.0377(15) 0.039 Uiso 1 1 d D . . 
O3W O -0.1759(3) 0.01272(14) 0.02505(10) 0.0252(4) Uani 1 1 d D . . 
H3WA H -0.192(4) 0.021(2) 0.0754(8) 0.030 Uiso 1 1 d D . . 
H3WB H -0.250(4) 0.041(2) -0.0035(14) 0.030 Uiso 1 1 d D . . 
O11 O 0.1387(3) 0.10492(15) 0.16996(11) 0.0304(4) Uani 1 1 d . . . 
O12 O -0.1884(3) 0.04246(16) 0.16669(11) 0.0360(5) Uani 1 1 d . . . 
O21 O -0.0849(3) 0.24542(13) 0.11443(11) 0.0306(4) Uani 1 1 d . . . 
O22 O -0.2192(3) 0.36314(15) 0.09266(12) 0.0388(5) Uani 1 1 d . . . 
O31 O -0.0163(3) 0.14601(15) -0.06161(11) 0.0313(4) Uani 1 1 d . . . 
O32 O -0.3480(3) 0.07783(14) -0.07829(10) 0.0282(4) Uani 1 1 d . . . 
N1 N 0.3984(3) 0.33552(17) 0.18947(13) 0.0306(5) Uani 1 1 d . . . 
N2 N 0.2605(3) 0.36455(17) 0.05910(14) 0.0303(5) Uani 1 1 d . . . 
N11 N 0.1964(6) 0.1667(4) 0.58345(19) 0.0960(15) Uani 1 1 d . . . 
N21 N 0.2234(8) 0.6364(3) 0.5136(2) 0.1091(16) Uani 1 1 d . . . 
N31 N -0.3372(5) 0.1379(4) -0.4582(2) 0.0840(12) Uani 1 1 d . . . 
C1 C 0.4642(4) 0.3228(2) 0.25355(17) 0.0376(7) Uani 1 1 d . . . 
H1A H 0.4525 0.2561 0.2520 0.045 Uiso 1 1 calc R . . 
C2 C 0.5502(5) 0.4039(3) 0.32332(19) 0.0502(9) Uani 1 1 d . . . 
H2A H 0.5926 0.3914 0.3671 0.060 Uiso 1 1 calc R . . 
C3 C 0.5704(5) 0.5017(3) 0.3256(2) 0.0572(10) Uani 1 1 d . . . 
H3A H 0.6268 0.5568 0.3715 0.069 Uiso 1 1 calc R . . 
C4 C 0.5072(4) 0.5196(2) 0.2597(2) 0.0442(8) Uani 1 1 d . . . 
C5 C 0.5290(6) 0.6208(3) 0.2572(3) 0.0650(12) Uani 1 1 d . . . 
H5A H 0.5861 0.6779 0.3018 0.078 Uiso 1 1 calc R . . 
C6 C 0.4694(7) 0.6346(3) 0.1926(3) 0.0670(12) Uani 1 1 d . . . 
H6A H 0.4881 0.7012 0.1929 0.080 Uiso 1 1 calc R . . 
C7 C 0.3776(5) 0.5497(2) 0.1230(2) 0.0479(9) Uani 1 1 d . . . 
C8 C 0.3124(6) 0.5606(3) 0.0541(2) 0.0561(10) Uani 1 1 d . . . 
H8A H 0.3275 0.6259 0.0521 0.067 Uiso 1 1 calc R . . 
C9 C 0.2269(5) 0.4762(3) -0.0099(2) 0.0517(9) Uani 1 1 d . . . 
H9A H 0.1860 0.4827 -0.0563 0.062 Uiso 1 1 calc R . . 
C10 C 0.2017(5) 0.3797(2) -0.0048(2) 0.0411(7) Uani 1 1 d . . . 
H10A H 0.1399 0.3222 -0.0488 0.049 Uiso 1 1 calc R . . 
C11 C 0.3508(4) 0.4487(2) 0.12316(18) 0.0333(7) Uani 1 1 d . . . 
C12 C 0.4200(4) 0.4331(2) 0.19192(18) 0.0331(7) Uani 1 1 d . . . 
C101 C 0.0430(4) 0.1045(2) 0.28541(15) 0.0277(6) Uani 1 1 d . . . 
C102 C -0.1068(5) 0.1113(3) 0.32620(17) 0.0422(8) Uani 1 1 d . . . 
H10B H -0.2364 0.1033 0.3012 0.051 Uiso 1 1 calc R . . 
C103 C -0.0667(5) 0.1298(3) 0.40330(19) 0.0547(10) Uani 1 1 d . . . 
H10C H -0.1678 0.1349 0.4304 0.066 Uiso 1 1 calc R . . 
C104 C 0.1262(5) 0.1405(3) 0.43980(17) 0.0499(9) Uani 1 1 d . . . 
C105 C 0.2791(5) 0.1355(3) 0.40052(18) 0.0467(8) Uani 1 1 d . . . 
H10D H 0.4088 0.1439 0.4256 0.056 Uiso 1 1 calc R . . 
C106 C 0.2361(4) 0.1179(2) 0.32332(16) 0.0370(7) Uani 1 1 d . . . 
H10E H 0.3382 0.1149 0.2965 0.044 Uiso 1 1 calc R . . 
C107 C -0.0065(4) 0.0819(2) 0.20093(15) 0.0259(6) Uani 1 1 d . . . 
C108 C 0.1673(6) 0.1556(4) 0.5206(2) 0.0691(12) Uani 1 1 d . . . 
C201 C -0.0422(4) 0.4005(2) 0.21799(16) 0.0299(6) Uani 1 1 d . . . 
C202 C 0.0013(4) 0.3582(2) 0.27223(18) 0.0378(7) Uani 1 1 d . . . 
H20A H -0.0138 0.2881 0.2570 0.045 Uiso 1 1 calc R . . 
C203 C 0.0666(5) 0.4186(3) 0.34826(19) 0.0487(8) Uani 1 1 d . . . 
H20B H 0.0909 0.3891 0.3844 0.058 Uiso 1 1 calc R . . 
C204 C 0.0962(5) 0.5243(3) 0.37079(19) 0.0478(8) Uani 1 1 d . . . 
C205 C 0.0552(5) 0.5674(2) 0.3170(2) 0.0465(8) Uani 1 1 d . . . 
H20C H 0.0750 0.6379 0.3320 0.056 Uiso 1 1 calc R . . 
C206 C -0.0149(4) 0.5060(2) 0.24122(18) 0.0381(7) Uani 1 1 d . . . 
H20D H -0.0441 0.5352 0.2053 0.046 Uiso 1 1 calc R . . 
C207 C -0.1213(4) 0.3324(2) 0.13456(16) 0.0278(6) Uani 1 1 d . . . 
C208 C 0.1674(7) 0.5876(3) 0.4506(2) 0.0708(12) Uani 1 1 d . . . 
C301 C -0.2254(4) 0.1229(2) -0.17800(15) 0.0270(6) Uani 1 1 d . . . 
C302 C -0.0605(4) 0.1530(2) -0.20791(17) 0.0362(7) Uani 1 1 d . . . 
H30A H 0.0694 0.1699 -0.1792 0.043 Uiso 1 1 calc R . . 
C303 C -0.0870(5) 0.1582(3) -0.27991(18) 0.0440(8) Uani 1 1 d . . . 
H30B H 0.0241 0.1787 -0.2997 0.053 Uiso 1 1 calc R . . 
C304 C -0.2820(5) 0.1326(2) -0.32251(17) 0.0387(7) Uani 1 1 d . . . 
C305 C -0.4485(5) 0.1029(2) -0.29269(17) 0.0381(7) Uani 1 1 d . . . 
H30C H -0.5784 0.0868 -0.3211 0.046 Uiso 1 1 calc R . . 
C306 C -0.4197(4) 0.0976(2) -0.22080(16) 0.0317(6) Uani 1 1 d . . . 
H30D H -0.5305 0.0772 -0.2009 0.038 Uiso 1 1 calc R . . 
C307 C -0.1950(4) 0.11495(19) -0.10006(15) 0.0245(6) Uani 1 1 d . . . 
C308 C -0.3135(5) 0.1353(3) -0.3986(2) 0.0531(9) Uani 1 1 d . . . 
  
loop_ 
 _atom_site_aniso_label 
 _atom_site_aniso_U_11 
 _atom_site_aniso_U_22 
 _atom_site_aniso_U_33 
 _atom_site_aniso_U_23 
 _atom_site_aniso_U_13 
 _atom_site_aniso_U_12 
La1 0.01925(8) 0.02175(9) 0.01928(9) 0.00822(6) 0.00372(6) 0.00629(6) 
O1W 0.0225(9) 0.0332(11) 0.0526(13) 0.0217(10) 0.0056(9) 0.0077(8) 
O3W 0.0281(9) 0.0284(10) 0.0215(10) 0.0097(8) 0.0056(8) 0.0114(8) 
O11 0.0282(9) 0.0403(11) 0.0264(10) 0.0173(9) 0.0075(8) 0.0093(8) 
O12 0.0271(10) 0.0534(13) 0.0263(10) 0.0170(10) 0.0048(8) 0.0066(9) 
O21 0.0296(10) 0.0251(10) 0.0393(11) 0.0103(9) 0.0110(9) 0.0118(8) 
O22 0.0459(12) 0.0337(11) 0.0377(12) 0.0144(10) 0.0017(10) 0.0157(9) 
O31 0.0276(10) 0.0387(11) 0.0254(10) 0.0149(9) 0.0002(8) 0.0046(8) 
O32 0.0270(9) 0.0339(10) 0.0283(10) 0.0150(8) 0.0080(8) 0.0110(8) 
N1 0.0246(11) 0.0323(13) 0.0310(13) 0.0078(10) 0.0038(10) 0.0076(10) 
N2 0.0266(11) 0.0296(12) 0.0381(14) 0.0151(11) 0.0096(10) 0.0091(10) 
N11 0.072(2) 0.166(4) 0.0305(19) 0.029(2) 0.0052(17) 0.012(3) 
N21 0.164(5) 0.091(3) 0.042(2) 0.006(2) -0.008(3) 0.025(3) 
N31 0.068(2) 0.150(4) 0.045(2) 0.057(2) 0.0111(17) 0.023(2) 
C1 0.0336(15) 0.0412(17) 0.0320(16) 0.0090(14) 0.0009(13) 0.0095(13) 
C2 0.0381(17) 0.071(3) 0.0292(17) 0.0093(17) 0.0007(14) 0.0103(17) 
C3 0.0447(19) 0.051(2) 0.045(2) -0.0104(17) 0.0024(16) 0.0003(16) 
C4 0.0333(16) 0.0365(17) 0.046(2) -0.0009(15) 0.0071(14) 0.0028(13) 
C5 0.067(2) 0.0290(18) 0.071(3) -0.0082(19) 0.014(2) -0.0003(17) 
C6 0.079(3) 0.0240(18) 0.090(3) 0.011(2) 0.027(3) 0.0094(17) 
C7 0.0452(18) 0.0292(16) 0.076(3) 0.0209(17) 0.0271(18) 0.0139(14) 
C8 0.064(2) 0.040(2) 0.089(3) 0.043(2) 0.033(2) 0.0242(17) 
C9 0.054(2) 0.052(2) 0.070(3) 0.042(2) 0.0201(19) 0.0221(17) 
C10 0.0422(17) 0.0416(18) 0.0477(19) 0.0254(15) 0.0105(15) 0.0143(14) 
C11 0.0273(14) 0.0282(15) 0.0501(19) 0.0156(14) 0.0175(13) 0.0115(12) 
C12 0.0224(13) 0.0252(14) 0.0447(18) 0.0060(13) 0.0108(12) 0.0019(11) 
C101 0.0319(14) 0.0280(14) 0.0230(14) 0.0108(11) 0.0058(11) 0.0065(11) 
C102 0.0344(15) 0.061(2) 0.0273(16) 0.0132(15) 0.0073(13) 0.0110(15) 
C103 0.0454(19) 0.083(3) 0.0281(17) 0.0155(17) 0.0152(15) 0.0082(18) 
C104 0.057(2) 0.063(2) 0.0195(15) 0.0107(15) 0.0066(15) 0.0069(17) 
C105 0.0412(17) 0.066(2) 0.0277(16) 0.0174(16) -0.0003(14) 0.0107(16) 
C106 0.0370(15) 0.0492(18) 0.0252(15) 0.0148(14) 0.0074(13) 0.0116(14) 
C107 0.0293(14) 0.0272(14) 0.0248(14) 0.0122(11) 0.0080(11) 0.0098(11) 
C108 0.057(2) 0.108(3) 0.027(2) 0.019(2) 0.0033(17) 0.006(2) 
C201 0.0258(13) 0.0316(15) 0.0353(16) 0.0120(12) 0.0114(12) 0.0117(11) 
C202 0.0410(16) 0.0385(17) 0.0392(17) 0.0165(14) 0.0091(14) 0.0178(13) 
C203 0.054(2) 0.062(2) 0.0383(19) 0.0235(17) 0.0090(16) 0.0258(17) 
C204 0.0461(18) 0.054(2) 0.0357(18) 0.0070(16) 0.0075(15) 0.0135(16) 
C205 0.0527(19) 0.0316(17) 0.047(2) 0.0052(15) 0.0090(16) 0.0103(15) 
C206 0.0405(16) 0.0332(16) 0.0414(18) 0.0135(14) 0.0082(14) 0.0125(13) 
C207 0.0220(12) 0.0282(14) 0.0354(16) 0.0142(12) 0.0115(12) 0.0052(11) 
C208 0.089(3) 0.067(3) 0.041(2) 0.007(2) 0.001(2) 0.019(2) 
C301 0.0309(14) 0.0248(13) 0.0236(14) 0.0087(11) 0.0036(11) 0.0066(11) 
C302 0.0290(14) 0.0468(18) 0.0311(16) 0.0186(14) 0.0031(12) 0.0039(13) 
C303 0.0413(17) 0.059(2) 0.0324(17) 0.0227(16) 0.0122(14) 0.0054(15) 
C304 0.0471(17) 0.0438(17) 0.0256(15) 0.0173(14) 0.0046(13) 0.0096(14) 
C305 0.0379(16) 0.0452(18) 0.0302(16) 0.0169(14) -0.0017(13) 0.0107(14) 
C306 0.0320(14) 0.0369(16) 0.0289(15) 0.0165(13) 0.0064(12) 0.0090(12) 
C307 0.0300(14) 0.0214(13) 0.0230(13) 0.0078(11) 0.0041(11) 0.0106(11) 
C308 0.049(2) 0.078(3) 0.0359(19) 0.0318(18) 0.0070(16) 0.0109(18) 
  
_geom_special_details 
; 
 All esds (except the esd in the dihedral angle between two l.s. planes) 
 are estimated using the full covariance matrix.  The cell esds are taken 
 into account individually in the estimation of esds in distances, angles 
 and torsion angles; correlations between esds in cell parameters are only 
 used when they are defined by crystal symmetry.  An approximate (isotropic) 
 treatment of cell esds is used for estimating esds involving l.s. planes. 
; 
  
loop_ 
 _geom_bond_atom_site_label_1 
 _geom_bond_atom_site_label_2 
 _geom_bond_distance 
 _geom_bond_site_symmetry_2 
 _geom_bond_publ_flag 
La1 O31 2.4584(18) . ? 
La1 O11 2.4831(19) . ? 
La1 O21 2.4840(18) . ? 
La1 O2W 2.5766(19) . ? 
La1 O1W 2.6156(19) . ? 
La1 O3W 2.6323(18) 2 ? 
La1 N1 2.723(2) . ? 
La1 N2 2.743(2) . ? 
La1 O3W 2.7434(18) . ? 
La1 La1 4.5826(6) 2 ? 
La1 La1 6.99710(11) 1_655 ? 
O1W H1WA 0.939(10) . ? 
O1W H1WB 0.941(10) . ? 
O2W H2WA 0.942(10) . ? 
O2W H2WB 0.953(10) . ? 
O3W La1 2.6323(18) 2 ? 
O3W H3WA 0.949(10) . ? 
O3W H3WB 0.946(10) . ? 
O11 C107 1.265(3) . ? 
O12 C107 1.254(3) . ? 
O21 C207 1.282(3) . ? 
O22 C207 1.233(3) . ? 
O31 C307 1.259(3) . ? 
O32 C307 1.256(3) . ? 
N1 C1 1.325(4) . ? 
N1 C12 1.356(4) . ? 
N2 C10 1.328(4) . ? 
N2 C11 1.358(4) . ? 
N11 C108 1.135(5) . ? 
N21 C208 1.136(5) . ? 
N31 C308 1.133(5) . ? 
C1 C2 1.398(4) . ? 
C1 H1A 0.9300 . ? 
C2 C3 1.361(5) . ? 
C2 H2A 0.9300 . ? 
C3 C4 1.391(5) . ? 
C3 H3A 0.9300 . ? 
C4 C12 1.411(4) . ? 
C4 C5 1.439(5) . ? 
C5 C6 1.332(6) . ? 
C5 H5A 0.9300 . ? 
C6 C7 1.425(5) . ? 
C6 H6A 0.9300 . ? 
C7 C8 1.395(5) . ? 
C7 C11 1.415(4) . ? 
C8 C9 1.354(5) . ? 
C8 H8A 0.9300 . ? 
C9 C10 1.387(4) . ? 
C9 H9A 0.9300 . ? 
C10 H10A 0.9300 . ? 
C11 C12 1.434(4) . ? 
C101 C102 1.384(4) . ? 
C101 C106 1.385(4) . ? 
C101 C107 1.504(4) . ? 
C102 C103 1.378(4) . ? 
C102 H10B 0.9300 . ? 
C103 C104 1.384(5) . ? 
C103 H10C 0.9300 . ? 
C104 C105 1.383(5) . ? 
C104 C108 1.456(5) . ? 
C105 C106 1.383(4) . ? 
C105 H10D 0.9300 . ? 
C106 H10E 0.9300 . ? 
C201 C202 1.385(4) . ? 
C201 C206 1.393(4) . ? 
C201 C207 1.517(4) . ? 
C202 C203 1.374(5) . ? 
C202 H20A 0.9300 . ? 
C203 C204 1.394(5) . ? 
C203 H20B 0.9300 . ? 
C204 C205 1.382(5) . ? 
C204 C208 1.443(5) . ? 
C205 C206 1.375(4) . ? 
C205 H20C 0.9300 . ? 
C206 H20D 0.9300 . ? 
C301 C302 1.387(4) . ? 
C301 C306 1.390(4) . ? 
C301 C307 1.509(4) . ? 
C302 C303 1.381(4) . ? 
C302 H30A 0.9300 . ? 
C303 C304 1.392(4) . ? 
C303 H30B 0.9300 . ? 
C304 C305 1.393(4) . ? 
C304 C308 1.445(4) . ? 
C305 C306 1.380(4) . ? 
C305 H30C 0.9300 . ? 
C306 H30D 0.9300 . ? 
  
loop_ 
 _geom_angle_atom_site_label_1 
 _geom_angle_atom_site_label_2 
 _geom_angle_atom_site_label_3 
 _geom_angle 
 _geom_angle_site_symmetry_1 
 _geom_angle_site_symmetry_3 
 _geom_angle_publ_flag 
O31 La1 O11 139.46(6) . . ? 
O31 La1 O21 84.93(6) . . ? 
O11 La1 O21 79.27(6) . . ? 
O31 La1 O2W 76.35(6) . . ? 
O11 La1 O2W 137.36(6) . . ? 
O21 La1 O2W 137.28(6) . . ? 
O31 La1 O1W 136.86(7) . . ? 
O11 La1 O1W 68.09(6) . . ? 
O21 La1 O1W 138.19(7) . . ? 
O2W La1 O1W 69.27(6) . . ? 
O31 La1 O3W 75.32(6) . 2 ? 
O11 La1 O3W 90.02(6) . 2 ? 
O21 La1 O3W 134.96(6) . 2 ? 
O2W La1 O3W 76.67(6) . 2 ? 
O1W La1 O3W 72.10(6) . 2 ? 
O31 La1 N1 135.19(7) . . ? 
O11 La1 N1 77.03(7) . . ? 
O21 La1 N1 77.40(6) . . ? 
O2W La1 N1 89.36(6) . . ? 
O1W La1 N1 70.54(7) . . ? 
O3W La1 N1 142.63(6) 2 . ? 
O31 La1 N2 75.68(7) . . ? 
O11 La1 N2 132.34(7) . . ? 
O21 La1 N2 72.77(6) . . ? 
O2W La1 N2 65.56(6) . . ? 
O1W La1 N2 110.92(6) . . ? 
O3W La1 N2 136.60(6) 2 . ? 
N1 La1 N2 59.85(7) . . ? 
O31 La1 O3W 70.29(6) . . ? 
O11 La1 O3W 69.37(6) . . ? 
O21 La1 O3W 72.28(5) . . ? 
O2W La1 O3W 132.56(6) . . ? 
O1W La1 O3W 116.48(6) . . ? 
O3W La1 O3W 63.06(6) 2 . ? 
N1 La1 O3W 137.99(6) . . ? 
N2 La1 O3W 132.60(6) . . ? 
O31 La1 La1 69.67(4) . 2 ? 
O11 La1 La1 77.84(4) . 2 ? 
O21 La1 La1 102.92(4) . 2 ? 
O2W La1 La1 105.81(4) . 2 ? 
O1W La1 La1 95.18(4) . 2 ? 
O3W La1 La1 32.25(4) 2 2 ? 
N1 La1 La1 154.33(5) . 2 ? 
N2 La1 La1 145.34(5) . 2 ? 
O3W La1 La1 30.80(4) . 2 ? 
O31 La1 La1 112.97(4) . 1_655 ? 
O11 La1 La1 96.90(4) . 1_655 ? 
O21 La1 La1 152.89(4) . 1_655 ? 
O2W La1 La1 40.47(4) . 1_655 ? 
O1W La1 La1 28.81(5) . 1_655 ? 
O3W La1 La1 71.33(4) 2 1_655 ? 
N1 La1 La1 75.60(5) . 1_655 ? 
N2 La1 La1 91.45(5) . 1_655 ? 
O3W La1 La1 131.81(4) . 1_655 ? 
La1 La1 La1 102.427(8) 2 1_655 ? 
La1 O1W H1WA 118.8(19) . . ? 
La1 O1W H1WB 134(2) . . ? 
H1WA O1W H1WB 105(3) . . ? 
La1 O2W H2WA 106.2(19) . . ? 
La1 O2W H2WB 116.9(18) . . ? 
H2WA O2W H2WB 108(2) . . ? 
La1 O3W La1 116.94(6) 2 . ? 
La1 O3W H3WA 117.8(17) 2 . ? 
La1 O3W H3WA 96.8(17) . . ? 
La1 O3W H3WB 109.2(17) 2 . ? 
La1 O3W H3WB 94.8(17) . . ? 
H3WA O3W H3WB 119(2) . . ? 
C107 O11 La1 133.70(17) . . ? 
C207 O21 La1 139.08(16) . . ? 
C307 O31 La1 140.95(17) . . ? 
C1 N1 C12 117.8(3) . . ? 
C1 N1 La1 120.25(19) . . ? 
C12 N1 La1 121.33(19) . . ? 
C10 N2 C11 117.8(3) . . ? 
C10 N2 La1 121.08(19) . . ? 
C11 N2 La1 120.94(19) . . ? 
N1 C1 C2 123.6(3) . . ? 
N1 C1 H1A 118.2 . . ? 
C2 C1 H1A 118.2 . . ? 
C3 C2 C1 118.4(3) . . ? 
C3 C2 H2A 120.8 . . ? 
C1 C2 H2A 120.8 . . ? 
C2 C3 C4 120.3(3) . . ? 
C2 C3 H3A 119.8 . . ? 
C4 C3 H3A 119.8 . . ? 
C3 C4 C12 117.5(3) . . ? 
C3 C4 C5 123.5(3) . . ? 
C12 C4 C5 119.0(3) . . ? 
C6 C5 C4 121.6(3) . . ? 
C6 C5 H5A 119.2 . . ? 
C4 C5 H5A 119.2 . . ? 
C5 C6 C7 121.5(3) . . ? 
C5 C6 H6A 119.3 . . ? 
C7 C6 H6A 119.3 . . ? 
C8 C7 C11 117.9(3) . . ? 
C8 C7 C6 123.4(3) . . ? 
C11 C7 C6 118.7(4) . . ? 
C9 C8 C7 120.0(3) . . ? 
C9 C8 H8A 120.0 . . ? 
C7 C8 H8A 120.0 . . ? 
C8 C9 C10 118.7(4) . . ? 
C8 C9 H9A 120.7 . . ? 
C10 C9 H9A 120.7 . . ? 
N2 C10 C9 123.9(3) . . ? 
N2 C10 H10A 118.0 . . ? 
C9 C10 H10A 118.0 . . ? 
N2 C11 C7 121.6(3) . . ? 
N2 C11 C12 118.2(2) . . ? 
C7 C11 C12 120.2(3) . . ? 
N1 C12 C4 122.4(3) . . ? 
N1 C12 C11 118.7(3) . . ? 
C4 C12 C11 118.9(3) . . ? 
C102 C101 C106 119.1(3) . . ? 
C102 C101 C107 119.8(2) . . ? 
C106 C101 C107 121.2(2) . . ? 
C103 C102 C101 121.0(3) . . ? 
C103 C102 H10B 119.5 . . ? 
C101 C102 H10B 119.5 . . ? 
C102 C103 C104 119.1(3) . . ? 
C102 C103 H10C 120.5 . . ? 
C104 C103 H10C 120.5 . . ? 
C105 C104 C103 121.0(3) . . ? 
C105 C104 C108 119.6(3) . . ? 
C103 C104 C108 119.3(3) . . ? 
C106 C105 C104 118.9(3) . . ? 
C106 C105 H10D 120.5 . . ? 
C104 C105 H10D 120.5 . . ? 
C105 C106 C101 120.9(3) . . ? 
C105 C106 H10E 119.6 . . ? 
C101 C106 H10E 119.6 . . ? 
O12 C107 O11 124.9(2) . . ? 
O12 C107 C101 117.6(2) . . ? 
O11 C107 C101 117.4(2) . . ? 
N11 C108 C104 179.0(5) . . ? 
C202 C201 C206 119.1(3) . . ? 
C202 C201 C207 120.3(3) . . ? 
C206 C201 C207 120.6(3) . . ? 
C203 C202 C201 120.9(3) . . ? 
C203 C202 H20A 119.6 . . ? 
C201 C202 H20A 119.6 . . ? 
C202 C203 C204 119.6(3) . . ? 
C202 C203 H20B 120.2 . . ? 
C204 C203 H20B 120.2 . . ? 
C205 C204 C203 120.0(3) . . ? 
C205 C204 C208 120.7(3) . . ? 
C203 C204 C208 119.3(4) . . ? 
C206 C205 C204 120.1(3) . . ? 
C206 C205 H20C 119.9 . . ? 
C204 C205 H20C 119.9 . . ? 
C205 C206 C201 120.4(3) . . ? 
C205 C206 H20D 119.8 . . ? 
C201 C206 H20D 119.8 . . ? 
O22 C207 O21 125.6(3) . . ? 
O22 C207 C201 118.1(2) . . ? 
O21 C207 C201 116.3(2) . . ? 
N21 C208 C204 179.3(5) . . ? 
C302 C301 C306 119.8(3) . . ? 
C302 C301 C307 120.3(2) . . ? 
C306 C301 C307 119.9(2) . . ? 
C303 C302 C301 120.7(3) . . ? 
C303 C302 H30A 119.6 . . ? 
C301 C302 H30A 119.6 . . ? 
C302 C303 C304 119.2(3) . . ? 
C302 C303 H30B 120.4 . . ? 
C304 C303 H30B 120.4 . . ? 
C303 C304 C305 120.5(3) . . ? 
C303 C304 C308 120.2(3) . . ? 
C305 C304 C308 119.3(3) . . ? 
C306 C305 C304 119.7(3) . . ? 
C306 C305 H30C 120.2 . . ? 
C304 C305 H30C 120.2 . . ? 
C305 C306 C301 120.2(3) . . ? 
C305 C306 H30D 119.9 . . ? 
C301 C306 H30D 119.9 . . ? 
O32 C307 O31 124.8(2) . . ? 
O32 C307 C301 118.2(2) . . ? 
O31 C307 C301 117.1(2) . . ? 
N31 C308 C304 179.6(5) . . ? 
  
loop_ 
 _geom_hbond_atom_site_label_D 
 _geom_hbond_atom_site_label_H 
 _geom_hbond_atom_site_label_A 
 _geom_hbond_distance_DH 
 _geom_hbond_distance_HA 
 _geom_hbond_distance_DA 
 _geom_hbond_angle_DHA 
 _geom_hbond_site_symmetry_A 
O1W H1WB O21  0.941(10) 2.026(13) 2.940(3) 163(3) 1_655 
O1W H1WA O32  0.939(10) 2.04(2) 2.799(3) 137(3) 2 
O2W H2WA O22  0.942(10) 1.808(11) 2.746(3) 173(3) 1_655 
O2W H2WB O32  0.953(10) 1.827(13) 2.750(3) 162(3) 1_655 
  
_diffrn_measured_fraction_theta_max    0.991 
_diffrn_reflns_theta_full              25.02 
_diffrn_measured_fraction_theta_full   0.991 
_refine_diff_density_max    1.051 
_refine_diff_density_min   -0.394 
_refine_diff_density_rms    0.066 
  
  
